# Supplementary material for: Animal, Herd and Feed Characteristics Associated with Blastocystis Prevalence and Molecular Diversity in Dairy Cattle from the North of France
Source: MDPI journal article supplement (doi:10.3390/parasitologia2010005), 2022-03-04
Supplement: s1 [file s1]

Archive with 1 entries (1 files):
- parasitologia-1606445-supplementary.pdf
