# Supplementary material for: Animal, Herd and Feed Characteristics Associated with Blastocystis Prevalence and Molecular Diversity in Dairy Cattle from the North of France
Source: MDPI journal article supplement (doi:10.3390/parasitologia2010005), 2022-03-04
Supplement: s1 [file s1 › parasitologia-1606445-supplementary.pdf]

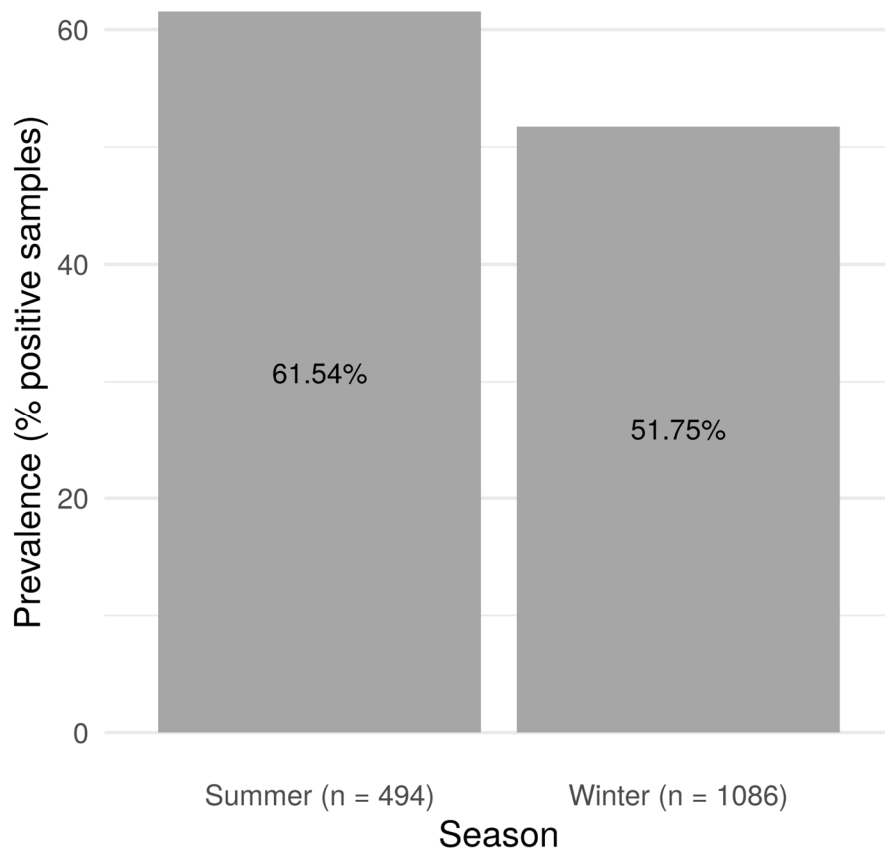

**Figure S1.** *Blastocystis* sp. prevalence according to the two sampling seasons. Pearson's Chi-squared test with Yates' continuity correction,  $p = 0.0003572$ .

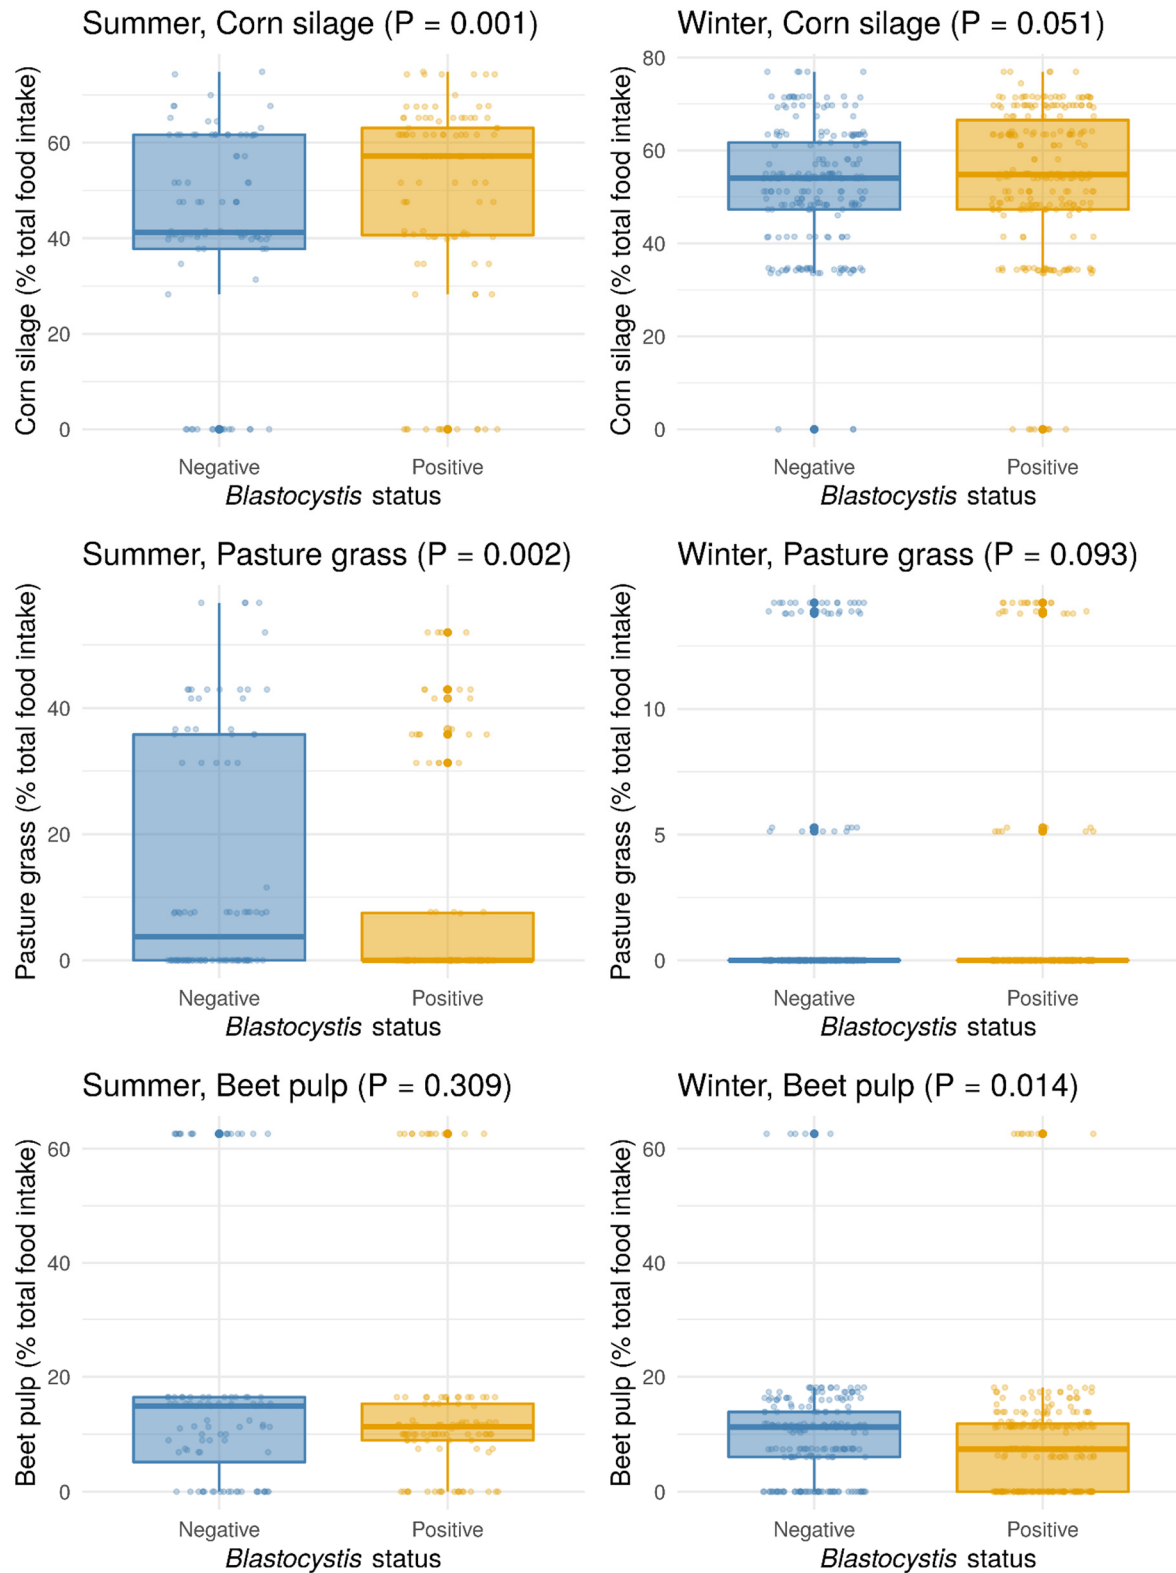

**Figure S2.** Corn silage, pasture grass and beet pulp effects on *Blastocystis* sp. prevalence in summer or winter (Wilcoxon test). Each food item value has been transformed into the percentage of total food intake.
